# Supplementary material for: SASH1 promotes melanin synthesis and migration via suppression of TGF-β1 secretion in melanocytes resulting in pathologic hyperpigmentation
Source: PubMed Central journal article supplement (PMC7053321; doi:10.7150/ijbs.38415), 2020-02-10
Supplement: ijbsv16p1264s1.pdf [file ijbsv16p1264s1.pdf]

### Supplementary Materials

Supplementary Figure 1. The pathological examination of skin biopsy in the proband. A and B revealed the presence of dense pigment granules in hyperpigmented area and few or no pigment granules in the basal layer in hyper- and hypo-pigmented area, respectively. A: HE Stain, 100× magnification, Scale bar: 5 μ m; B: HE Stain, 200× magnification, Scale bar: 10 μ m.

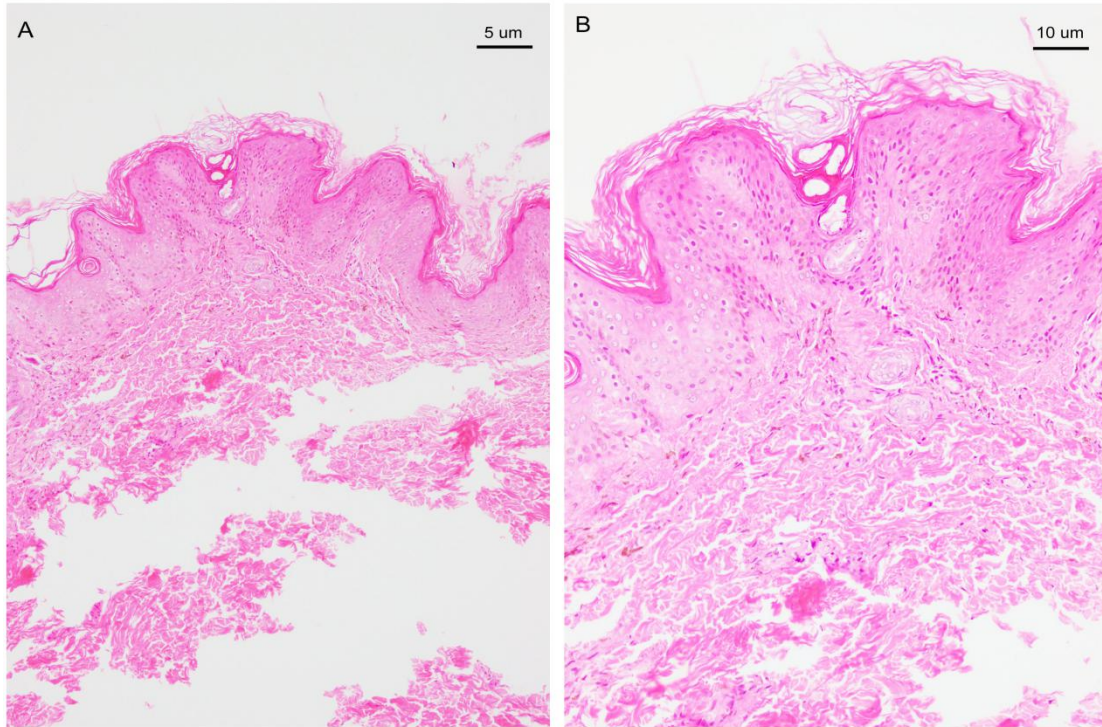

Supplementary Figure 2. The canonical data set of TGF- $\beta$ 1 and predicted downstream molecules. The orange and blue lines indicate the activating and inhibitory expression status between TGF- $\beta$ 1 and the downstream genes.

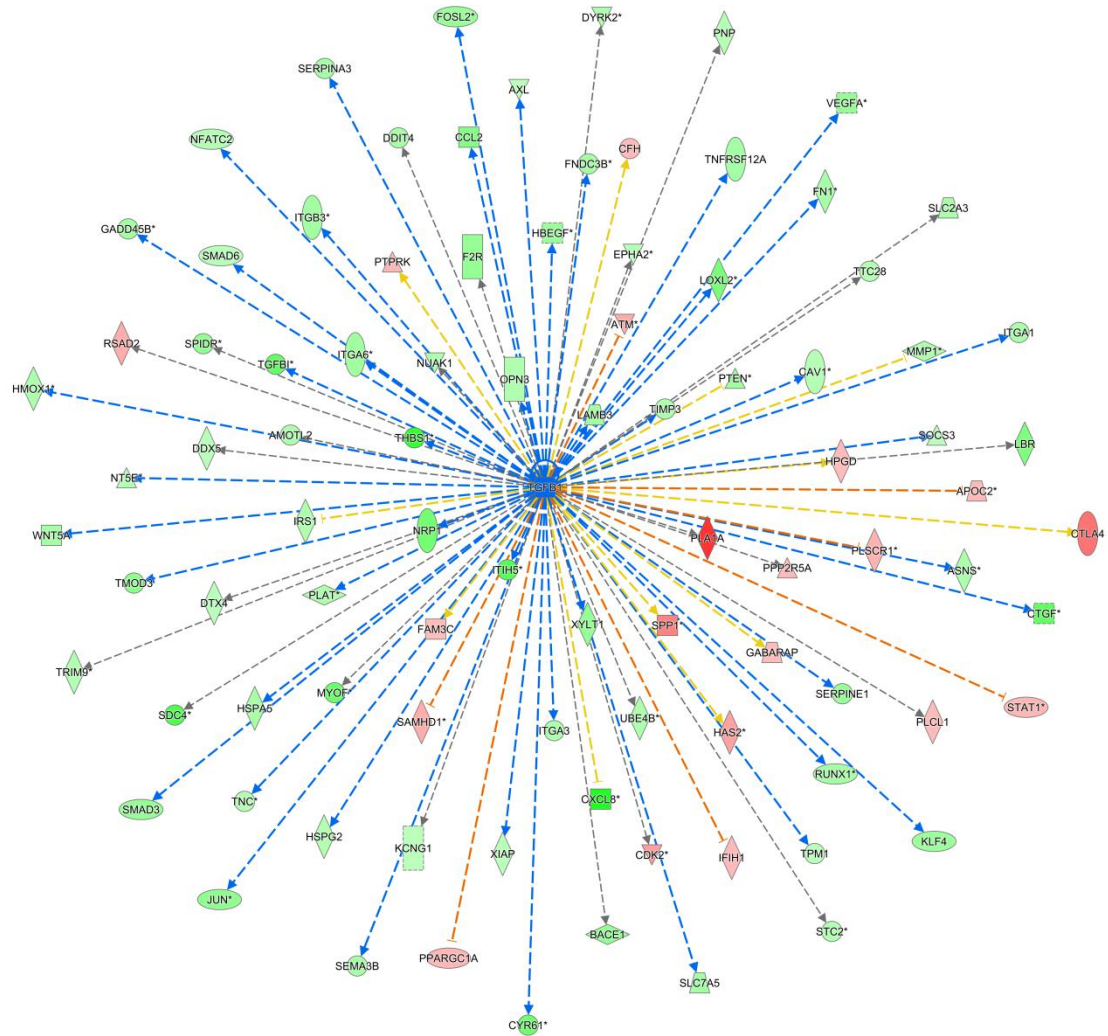

Supplementary Figure 3. Regulator effect network containing the paths from regulator to TGF- $\beta$ 1. The network showed a high consistency score, indicating the more accurate the result of regulation between TGF- $\beta$ 1 and cell migration.

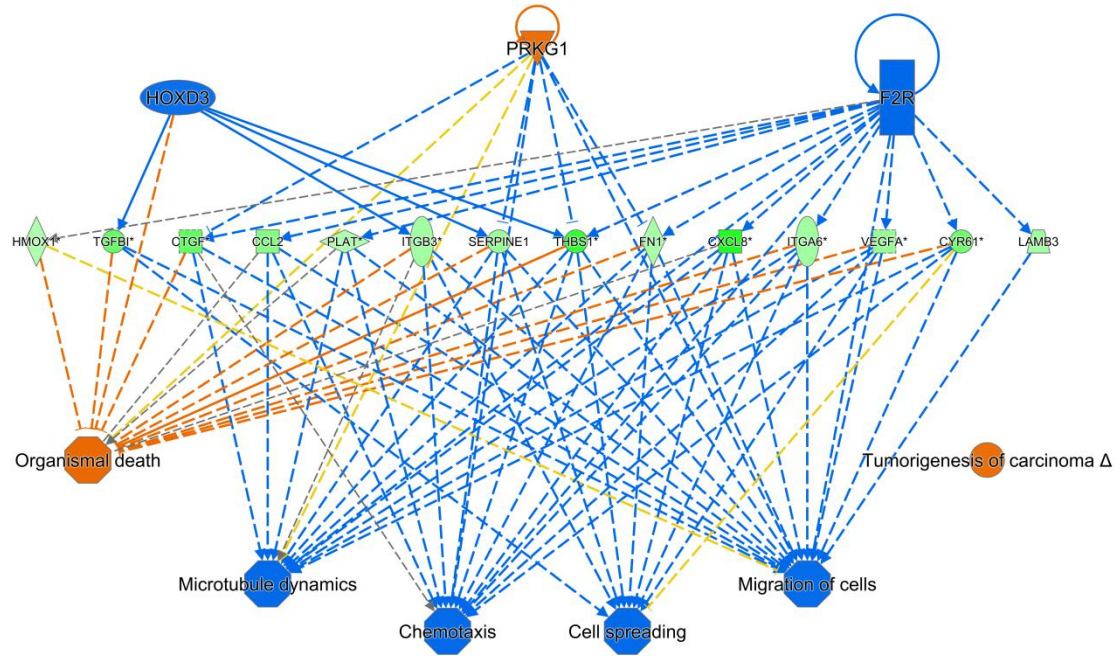

Supplementary Table 1. Summary of two exome sequencing data production.

| Sample:                                        | DUH-III:10         | DUH-II:2          |
|------------------------------------------------|--------------------|-------------------|
| Total clean reads                              | 103072538 (100%)   | 78887144 (100%)   |
| Reads mapped to genome                         | 102950330 (99.88%) | 78774829 (99.86%) |
| Data mapped to genome(Mb)                      | 12617.27           | 10049.09          |
| Data mapped to target region (Mb) <sup>a</sup> | 7556.27            | 6366.52           |
| Fraction_of_effective_bases_on_target          | 59.9%              | 63.4%             |
| Fraction_of_effective_bases_on_or_near_target  | 77.1%              | 79.0%             |
| Average_sequencing_depth_on_target             | 124.99             | 105.31            |
| Bases_covered_on_target                        | 60391687           | 60387493          |
| Coverage_of_target_region                      | 99.9%              | 99.9%             |
| Fraction_of_target_covered_with_at_least_100x  | 48.6%              | 39.1%             |
| Fraction_of_target_covered_with_at_least_50x   | 82.2%              | 70.9%             |
| Fraction_of_target_covered_with_at_least_20x   | 98.2%              | 95.8%             |
| Fraction_of_target_covered_with_at_least_10x   | 99.6%              | 99.1%             |
| Fraction_of_target_covered_with_at_least_4x    | 99.8%              | 99.8%             |

<sup>a</sup> Target regions here refer to the regions that are actually covered by the designed probes.

Supplementary Table 2. The screening process in identifying the potential mutations from exome data.

|                                                           | DUH-III:10                                                                                | DUH-II:2       |
|-----------------------------------------------------------|-------------------------------------------------------------------------------------------|----------------|
| Total SNPs & Indels                                       | 267113 & 35969                                                                            | 191063 & 22654 |
| Potential SNPs & Indels <sup>a</sup>                      | 23248 & 710                                                                               | 23360 & 680    |
| Filtered_dbSNP_1000genomes_Deleterious <sup>b</sup>       | 1115 & 611                                                                                |                |
| Filtered_dbSNP_1000genomes_Deleterious_Model <sup>c</sup> | 324SNVs in 280 genes & 139 Indels in 114 genes)                                           |                |
| Within the linkage region <sup>d</sup>                    | five genes( <i>CPS1</i> , <i>SASH1</i> , <i>PTPRQ</i> , <i>CEP290</i> , <i>C12orf42</i> ) |                |
| Mutation analysis                                         | c.1761C>G (p.Ser587Arg) in exon 15 of <i>SASH1</i>                                        |                |

<sup>a</sup> Potential SNP & Indels includes nonsynonymous variants, splicing site variants and insertion/deletion variants located in exonic region.

<sup>b</sup> Variants were firstly excluded if they were present in the dbSNP (v.138 and v.142) database, the 1000 Genomes Project, the National Heart, Lung, and Blood Institute Exome Sequencing Project (ESP) Exome Variant Server (EVS), the Exome Aggregation Consortium (ExAC) Browser or the Novogene human WES & WGS databses. The filtered variants were evaluated with in silico tools SIFT, PolyPhen-2, MutationTaster and CADD, the candidates were predicted deleterious in at least 2 of the tools.

<sup>c</sup> On the basis of the autosomal-dominant genetic model in family pedigrees, we filtered compound heterozygous variants occurred in all affected members, but not in any of the unaffected individuals of the family.

<sup>d</sup> The linkage regions refer to chromosome 6q24.2-q25.2, 12q21-23 and 2q33.3-36.1 reported previously.

Supplementary Table 3. The screening process in identifying the potential mutations from exome data.

| Variants            | chr<br>osomal l<br>ocus | Gene     | dbSNP ID    | AF<br>in<br>1000geno<br>mes | F in<br>NHLBI-<br>ESP | AF in<br>ExAC | AF in<br>Novogene<br>WES | AF in<br>Novogene<br>WGS | SIFT                  | Polyphen2             | MutationT<br>aster    | CADD        |
|---------------------|-------------------------|----------|-------------|-----------------------------|-----------------------|---------------|--------------------------|--------------------------|-----------------------|-----------------------|-----------------------|-------------|
| chr2: 211521242CT>T | 2q34                    | CPS1     |             |                             |                       |               | 0.0099                   |                          |                       |                       |                       |             |
| chr6:148854933C>G   | 6q24.3                  | SASH1    | rs147541734 |                             |                       | 0.0004        |                          |                          | 0.0020,D <sup>1</sup> | 0.9760,D <sup>2</sup> | 1.0000,D <sup>3</sup> | 6.2385,28.8 |
| chr12: 80899857T>C  | 12q21.31                | PTPRQ    | rs200063017 | 0.0032                      | 0.0000                | 0.0004        | 0.0057                   | 0.0276                   | 0.0080,D <sup>1</sup> | 0.8030,P <sup>2</sup> | 0.9871,D <sup>3</sup> | 5.0900,25.3 |
| chr12: 88524335C>T  | 12q21.32                | CEP290   | rs10778257  |                             | 0.5798                | 0.6458        |                          |                          | 0.0120,D <sup>1</sup> | 0.0110,B <sup>2</sup> | 0.6943,N <sup>3</sup> | 4.2669,23.9 |
| chr12: 103872172T>G | 12q23.3                 | C12orf42 |             |                             |                       |               | 0.3324                   | 0.3565                   | 0.0000,D <sup>1</sup> | 0.0720,B <sup>2</sup> | 1.0000,P <sup>3</sup> | 2.5391,19.7 |

Abbreviations: AF, allele frequency; NHLBI-ESP, National Heart, Lung and Blood Institute-Exome sequencing program; ExAC, Exome Aggregation Consortium; WES, whole exome sequencing; WGS, whole genome sequencing; D<sup>1</sup>, Deleterious (sift<=0.05); D<sup>2</sup>, Probably damaging (>=0.909); P<sup>2</sup>, Possibly damaging (0.447<=pp2\_hvar<=0.909); B<sup>2</sup>, Benign(pp2\_hvar<=0.446); D<sup>3</sup>, Disease\_causing; N<sup>3</sup>, Polymorphism; P<sup>3</sup>, Polymorphism\_automatic.

Supplementary Table 4. The sequencing primers designed for the five potential mutations from exome data.

| Primer Name                | Strand | Sequence (5'-3')      | Product Size |
|----------------------------|--------|-----------------------|--------------|
| CPS1: exon31:c.3577-6G>-   | F      | GCACAGAGAGGCAGCATTTT  | 767bp        |
|                            | R      | GTCCACACCTGTTTCACCAC  |              |
| SASH1: exon15:c. 1761 C >G | F      | AGGTCACTCAGAGGGGTGA   | 580bp        |
|                            | R      | CTTACGCTATCACCCACAGC  |              |
| PTPRQ: exon12:c.T1811C     | F      | TCTGTGTGTTCTTCAGTGCA  | 919bp        |
|                            | R      | GAGCACTCCGAACTCCTTCA  |              |
| CEP290: exon8:c.G503A      | F      | CATCTCAGGTCTATGCGGGT  | 647bp        |
|                            | R      | CGGTAGTCACTGTCTTCCCC  |              |
| C12orf42: exon2:c.A33C     | F      | CCAAAGCAAGCACCCACCTAG | 980 bp       |
|                            | R      | TAACCCAGTGAGCCCTGTTT  |              |
